# Supplementary material for: Association of Gene Variants with Seasonal Variation in Muscle Strength and Aerobic Capacity in Elite Skiers
Source: MDPI journal article supplement (doi:10.3390/genes14061165), 2023-05-26
Supplement: s1 [file s1]

**Table S1.** Reaction conditions for the detection of gene polymorphisms with PCR. Reactions were carried out with 10 ng genomic DNA and specific combinations of 0.2  $\mu$ M primers and 2.5 mmol MgCl<sub>2</sub> using KAPA HRM FAST Master Mix (KAPA BIOSYSTEMS) on a real-time PCR system (EcoTM, Illumina, San Diego, USA).

| <i>Gene</i> | <i>Polymorphism</i>  | <i>Forward primer</i>             | <i>reverse primer</i>        | <i>thermal protocol</i>                                                                                                         |
|-------------|----------------------|-----------------------------------|------------------------------|---------------------------------------------------------------------------------------------------------------------------------|
| ACE         | rs1799752 - I allele | 5'-tggtgattacaggcgtgatacag-3'     | 5'-atttcagagctggaataaaatt-3' | 3 min at 95°C; 35 x (5 sec at 95°C, 30 sec at 55°C),<br>melting cycle (95°C, followed by ramp from 55°C<br>- 95°C, 0.3°C sec-1) |
| ACE         | rs1799752 - D allele | 5'-catcctttctcccatttctc-3'        | 5'-atttcagagctggaataaaatt-3' | 3 min at 95°C; 35 x (5 sec at 95°C, 30 sec at 55°C),<br>melting cycle (95°C, followed by ramp from 55°C<br>- 95°C, 0.3°C sec-1) |
| ACTN3       | rs1815739            | 5'-ctgtttgcctgtgtgtaagtggggggg-3' | 5'-tgtcacagtatgcaggagggg-3'  | 3 min at 95°C; 35 x (5 sec at 95°C, 30 sec at 60°C),<br>melting cycle (95°C, followed by ramp from 55°C<br>- 95°C, 0.3°C sec-1) |
| PTK2        | rs7460               | 5'-tggttcgggaactagctgta-3'        | 5'-atggaaaaggggatggtcc-3'    | 3 min at 95°C; 35 x (5 sec at 95°C, 30 sec at 60°C),<br>melting cycle (95°C, followed by ramp from 55°C<br>- 95°C, 0.3°C sec-1) |
| PTK2        | rs7843014            | 5'-tgatgggacctaaccatt-3'          | 5'-tttcccatcagctgcttgtt-3'   | 3 min at 95°C; 35 x (5 sec at 95°C, 30 sec at 60°C),<br>melting cycle (95°C, followed by ramp from 55°C<br>- 95°C, 0.3°C sec-1) |
| TNC         | rs2104772            | 5'-caaaaagcagtctgagccac-3'        | 5'-ttcagtagcctctctctgagac-3' | 3 min at 95°C; 35 x (5 sec at 95°C, 30 sec at 60°C),<br>melting cycle (95°C, followed by ramp from 55°C<br>- 95°C, 0.3°C sec-1) |
